# Supplementary material for: SQLE Knockdown inhibits bladder cancer progression by regulating the PTEN/AKT/GSK3β signaling pathway through P53
Source: PubMed Central journal article supplement (PMC10540347; doi:10.1186/s12935-023-02997-5), 2023-09-28

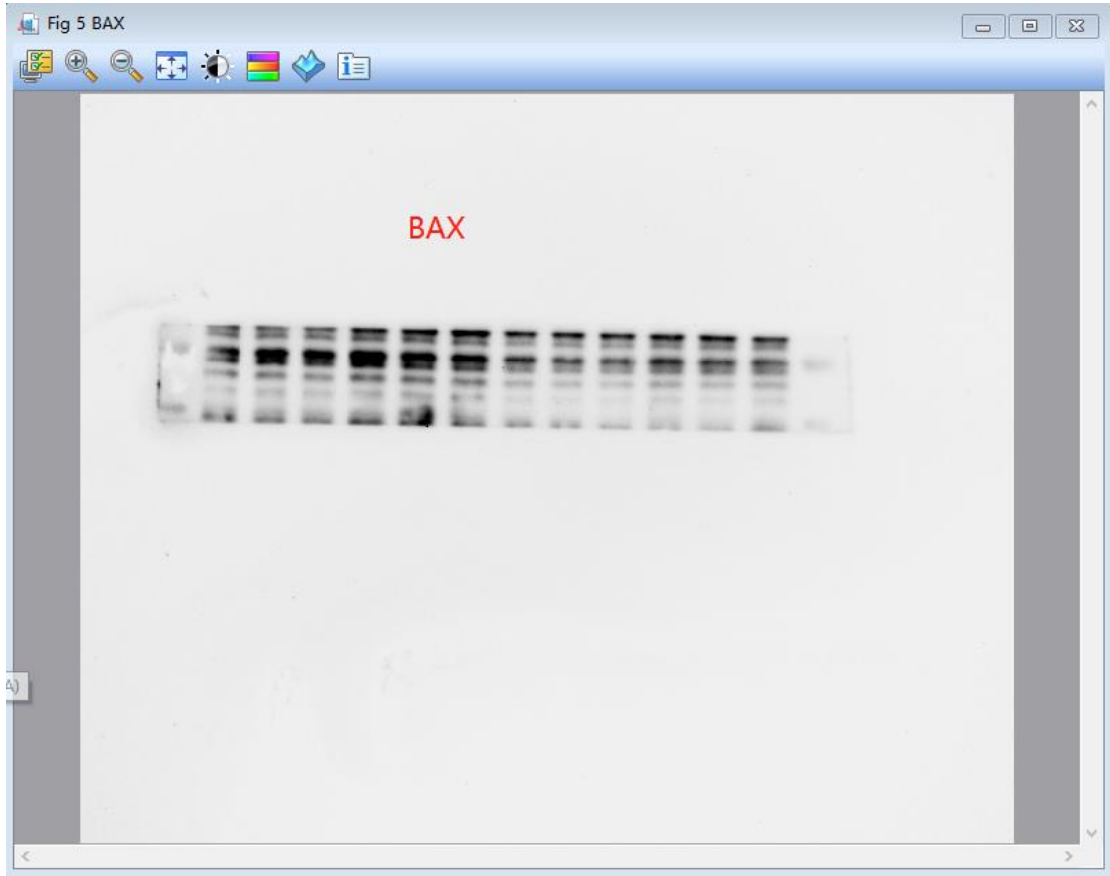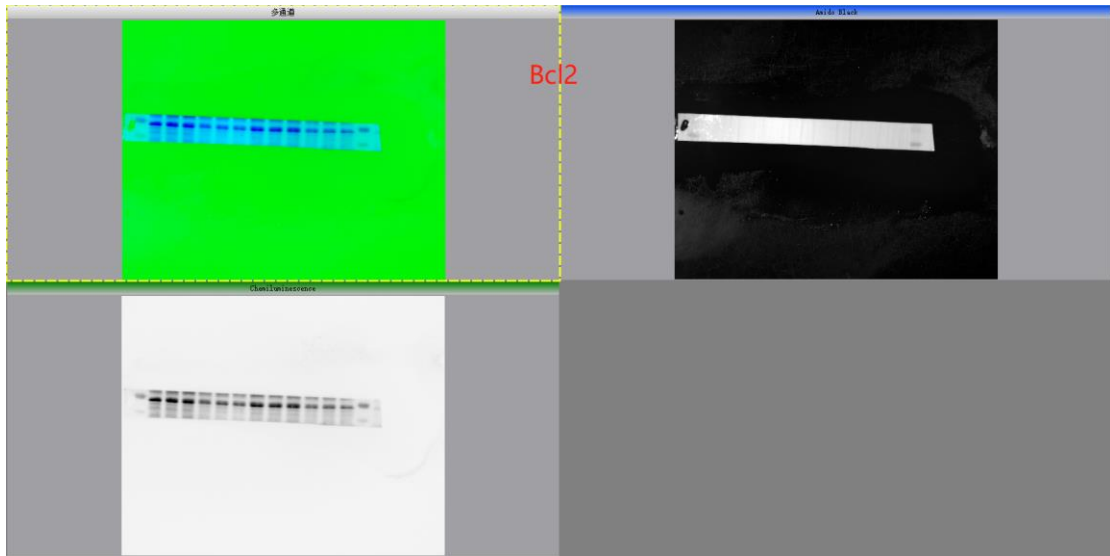

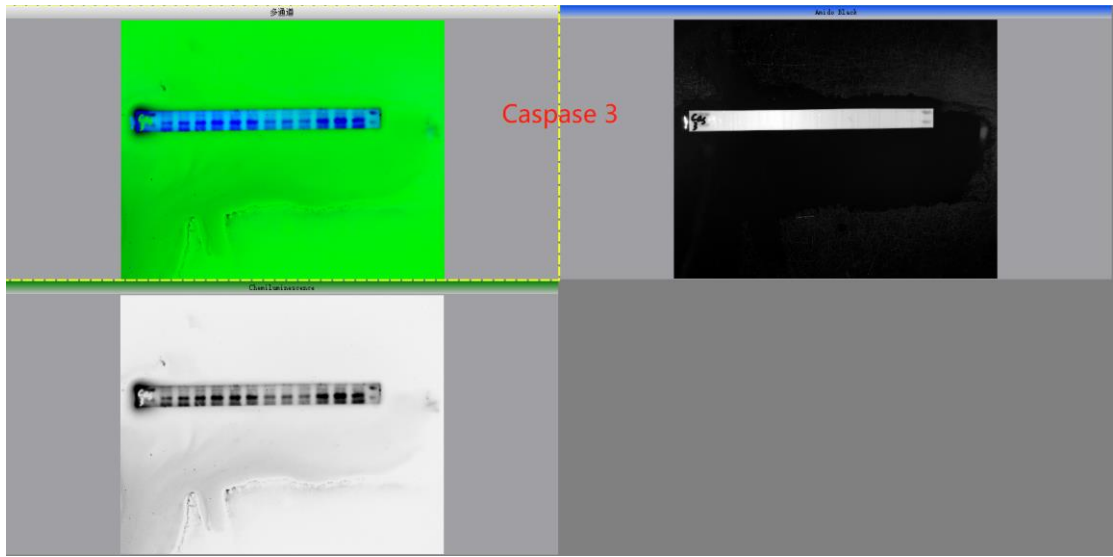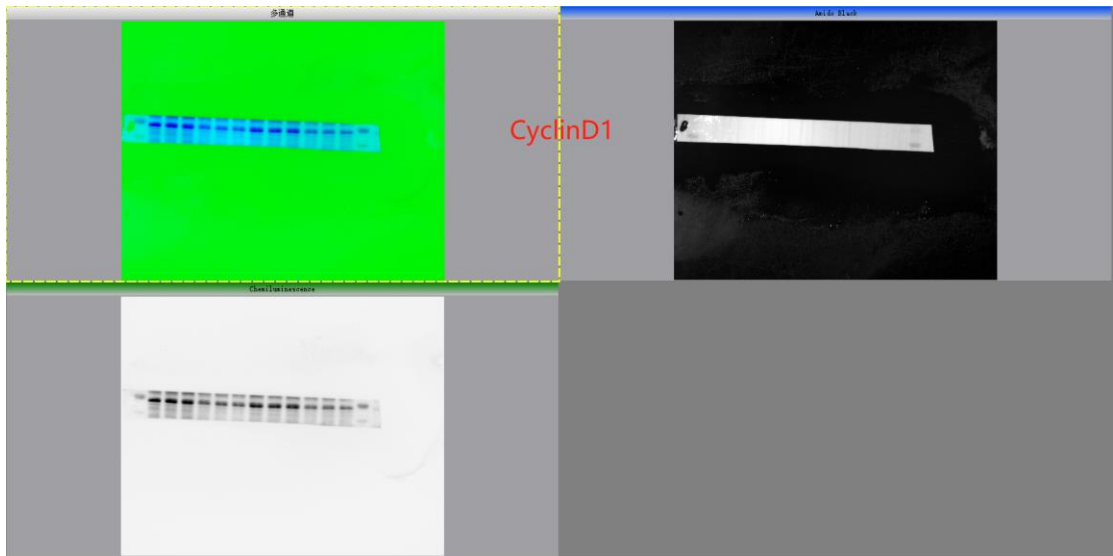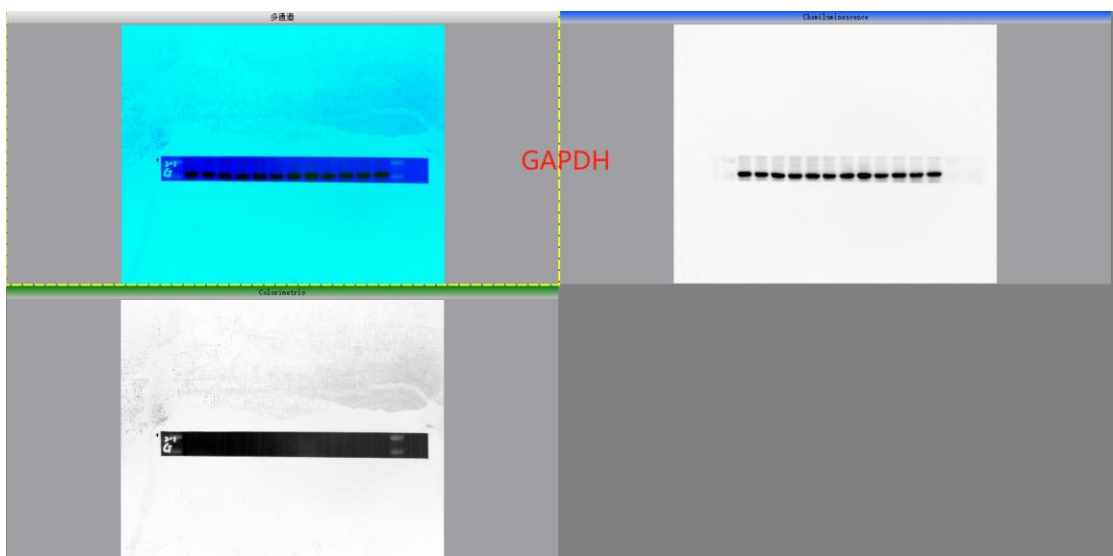

Supplement: 12935_2023_2997_MOESM1_ESM.pdf [file 12935_2023_2997_MOESM1_ESM.pdf]
